# Supplementary material for: EPAS1 expression contributes to maintenance of the primordial follicle pool in the mouse ovary
Source: Springer Nature journal article supplement (doi:10.1038/s41598-024-59382-z), 2024-04-16
Supplement: 41598_2024_59382_MOESM1_ESM.pdf [file 41598_2024_59382_MOESM1_ESM.pdf]

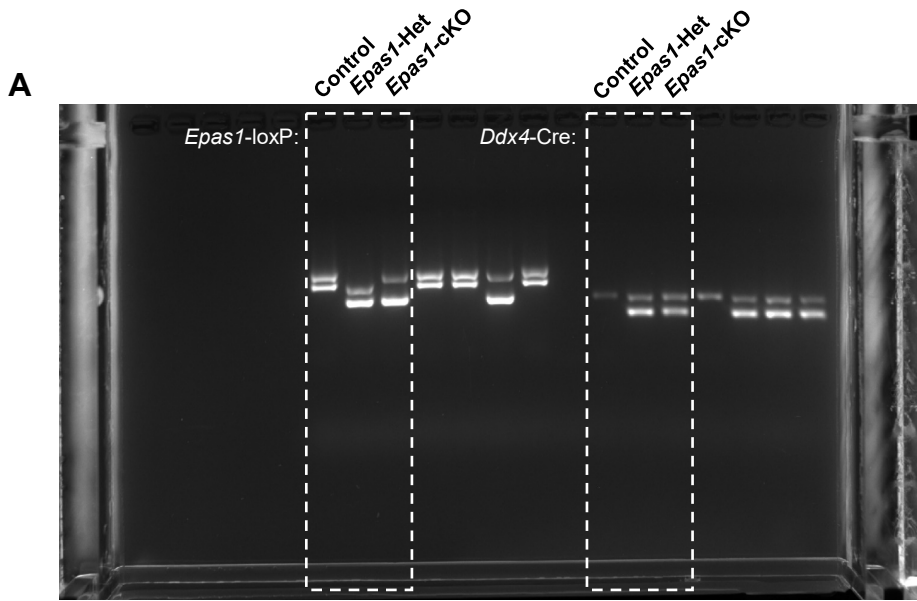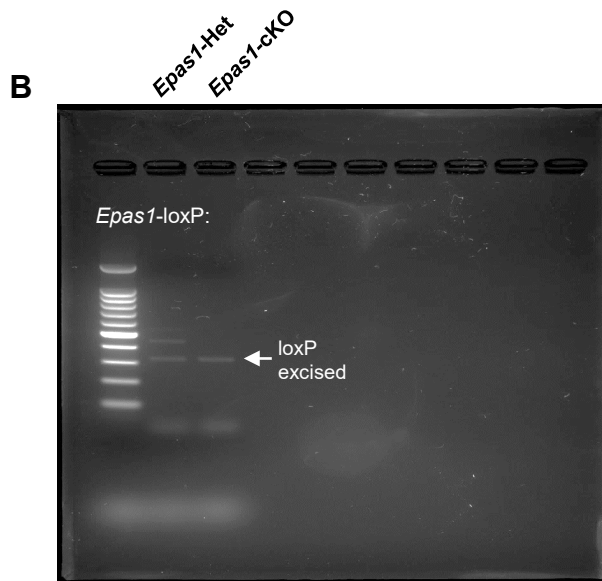

**Figure S1** (relates to Figure 2): **(A)** Uncropped version of genotyping gel presented in Fig. 2A **(B)** PCR analysis of oocytes collected from heterozygous and *Epas1*-cKO females, demonstrating efficient excision of the loxP allele in the cKO such that it is no longer detectable.

## SUPPLEMENTAL FIGURE 2

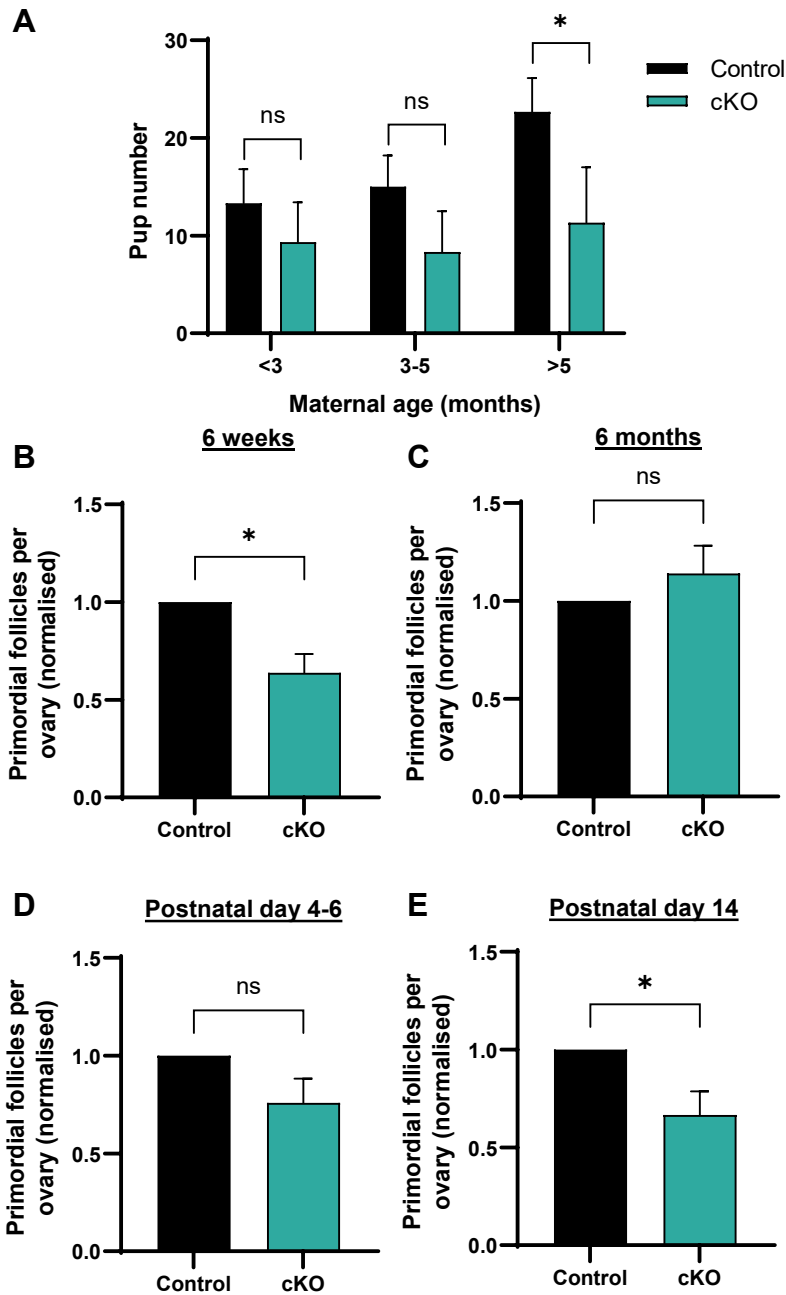

**Figure S2** (relates to Figure 4 and 5). **(A)** Pups produced by control or *Epas1*-cKO females (paired with control males) as a function of maternal age. Histogram shows mean  $\pm$  S.E.M. with values normalised to the control,  $n=3$  biological replicates, \* indicates statistical significance at  $p<0.05$ . **(B-E)** Primordial follicle counts for control and *Epas1*-cKO ovaries from adult females at 6 weeks (B) and 6 months (C) of age, and neonates / pre-pubescent females at postnatal day 4-6 (D) and 14 (E), respectively. Data here are based on estimates of total primordial follicle reserve using a serial sectioning approach. Histogram shows mean  $\pm$  S.E.M. with values normalised to the control,  $n=4$  biological replicates, \* indicates statistical significance at  $p<0.05$ .

SUPPLEMENTAL FIGURE 3

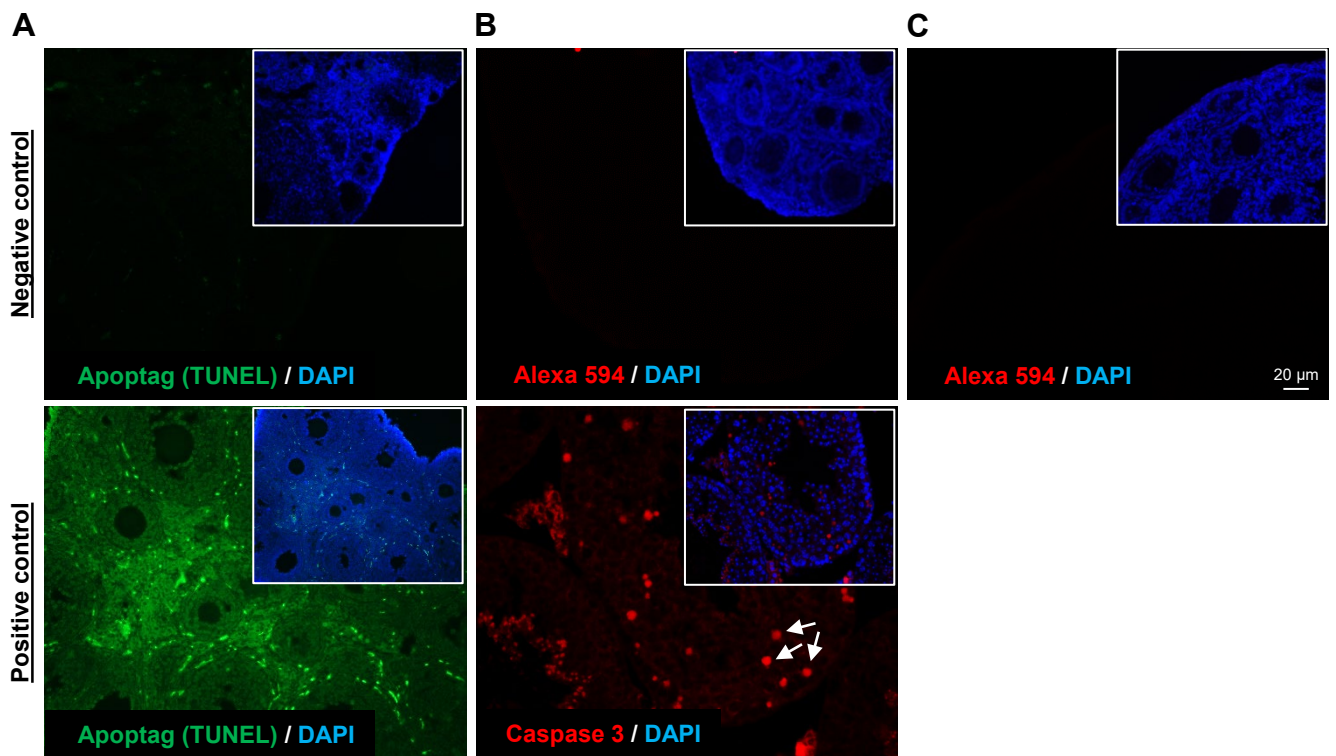

**Figure S3** (relates to Figure 6). **(A)** Positive and negative control images accompanying TUNEL (Apoptag) staining in control and *Epas1*-cKO ovaries in Fig. 6A. Negative control had Tdt enzyme omitted, and positive control was treated with DNase to induce DNA fragmentation. Scale bar = 20 μm. **(B)** Cleaved Caspase 3 positive and negative control images accompanying images in Fig. 6A. Negative control had primary antibody omitted, positive control was an adult mouse testis section harbouring apoptotic cells (white arrows). Scale bar = 20 μm. **(C)** Negative control image in which primary antibody was omitted, accompanying autophagy images presented in Fig. 6B. Scale bar = 20 μm.

**Table S1:** Primer sequences for genotyping

| <b>GENE</b>                                                 | <b>PRIMER</b>                                                                                                            | <b>PRODUCT SIZE</b>      |
|-------------------------------------------------------------|--------------------------------------------------------------------------------------------------------------------------|--------------------------|
| <b><i>Ddx4-Cre</i></b><br><b>(genotyping)</b>               | Internal positive control:<br>Fwd: 5' CTA GGC CAC AGA ATT GAA AGA TCT 3'<br>Rev: 5' GTA GGT GGA AAT TCT AGC ATC ATC C 3' | 324 bp                   |
|                                                             | Cre:<br>Fwd: 5' CAC GTG CAG CCG TTT AAG CCG CGT 3'<br>Rev: 5' TTC CCA TTC TAA ACA ACA CCC TGA A 3'                       | 240 bp                   |
| <b><i>Epas1-fl</i></b><br><b>(multiplex PCR genotyping)</b> | Fwd: 5' CAG GCA GTA TGC CTG GCT AAT TCC AGT T 3'                                                                         | Floxed allele: 444 bp    |
|                                                             | Rev 1: 5' CTT CTT CCA TCA TCT GGG ATC TGG GAC T 3'                                                                       | Wild type allele: 410 bp |
|                                                             | Rev 2: 5' GCT AAC ACT GTA CTG TCT GAA AGA GTA GC 3'                                                                      | KO allele: 340bp         |
